# Supplementary material
Source: publisher site journal article supplement (https://www.dovepress.com/article/383769)
Supplement: Supplementary file 1 [file get_supplementary_file.php]

Supplementary Table.1

# Blood test result

| 【CBC】         |                          | 【Biochemistry】 |          |          |               |
|---------------|--------------------------|----------------|----------|----------|---------------|
| WBC           | 4500/μL                  | TP             | 7.6 g/dL | BUN      | 16.2 mg/dL    |
| -Neut         | 65 %                     | Alb            | 4.3 g/dL | Cr       | 0.85 mg/dL    |
| -Lymph        | 27 %                     | T-Bil          | 2.5mg/dL | Na       | 137.6 mEq/L   |
| -Mono         | 5.3 %                    | D-Bil          | 0.4mg/dL | K        | 4.7 mEq/L     |
| -Eosin        | 1.8 %                    | AST            | 54 IU/L  | Cl       | 102.5 mEq/L   |
| RBC           | 433×10 <sup>4</sup> /μL  | ALT            | 33 IU/L  | CRP      | <=0.04 mg/dL  |
| Hb            | 14.0 g/dL                | LDH            | 197 IU/L | Glu      | 133 mg/dL     |
| Ht            | 42.1 %                   | ALP            | 240 IU/L | AFP      | 3 ng/mL       |
| MCV           | 97.2 fL                  | γ-GTP          | 56 IU/L  | PIVKA II | 1057.2 mAU/mL |
| MCH           | 32.3pg                   | HbA1c          | 5.7 %    |          |               |
| Plt           | 11.8×10 <sup>4</sup> /μL |                |          |          |               |
| 【Coagulation】 |                          |                |          |          |               |
| PT            | >100%                    |                |          |          |               |
| PT-INR        | 0.92                     |                |          |          |               |

Supplementary Figure.1

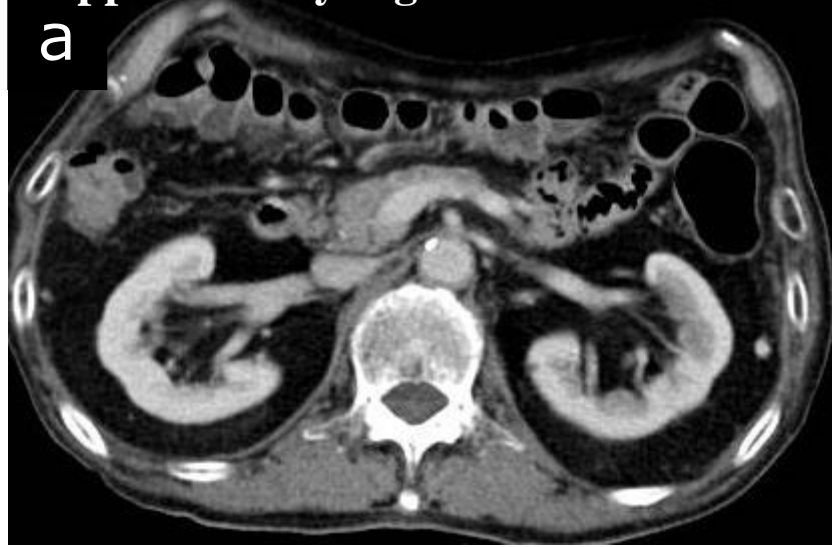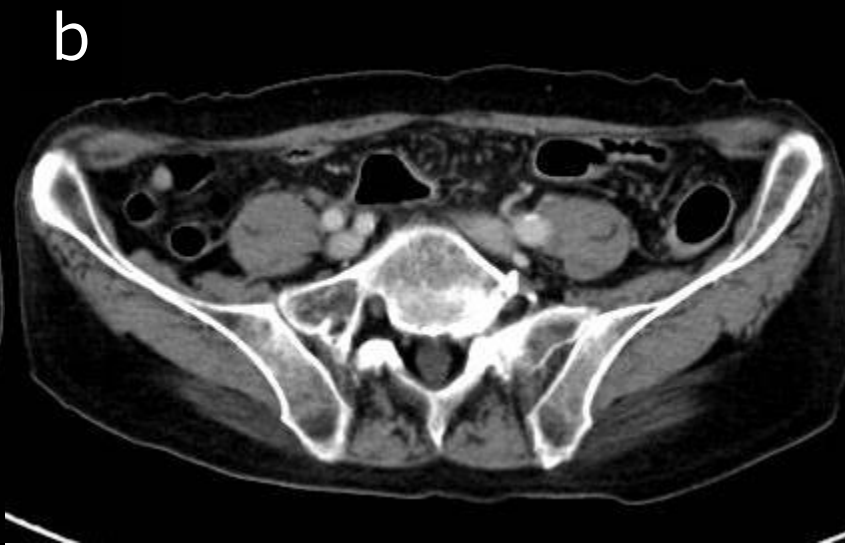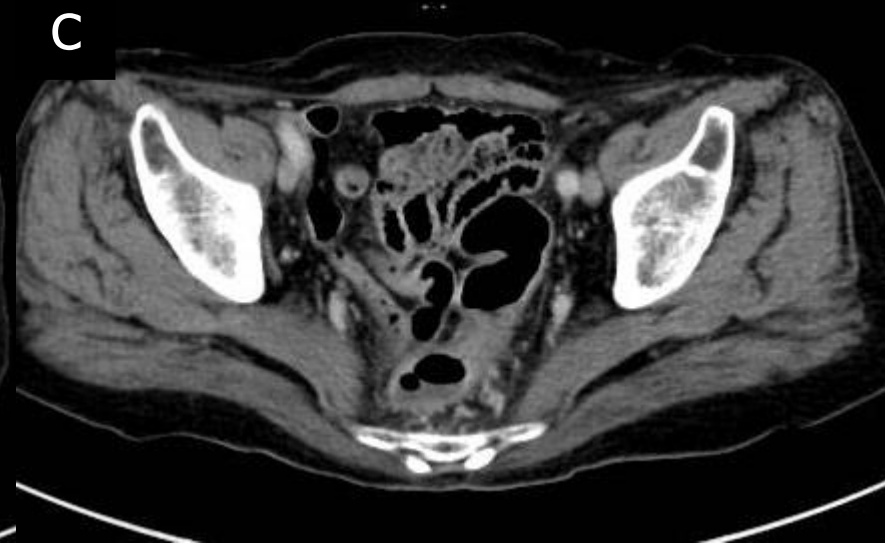

# Supplementary legends

- Supplementary Table 1
- The result of the laboratory examination on admission is presented.
  
- Supplementary Figure 1 Clinical images at the diagnosis with grade 3 diarrhea and grade 2 colitis
- (a)-(c) There were no findings indicative of peritonitis, such as ascites, swelling of the colonic wall, or dirty fat sign surrounding the colon.
